# Supplementary material for: Small molecules facilitate single factor-mediated sweat gland cell reprogramming
Source: PubMed Central journal article supplement (PMC8962256; doi:10.1186/s40779-022-00372-5), 2022-03-29
Supplement: 40779_2022_372_MOESM1_ESM.pdf [file 40779_2022_372_MOESM1_ESM.pdf]

**Table S1** Primer sequences used in the study

| <b>Genes</b>    | <b>Forward primer</b>    | <b>Reverse primer</b>  |
|-----------------|--------------------------|------------------------|
| CK5             | GGAGAAGGAGTTGGACCAGTCAAC | CTACCTCCGGCAAGACCTCCAC |
| CK10            | ATGTCTGTTCGATACAGCTCAAG  | CTCCACCAAGGGAGCCTTTG   |
| CK18            | GTTGACCGTGGAGGTAGATGC    | GAGCCAGCTCGTCATATTGGG  |
| CEA             | TAAGTGTTGACCACAGCGACCC   | GTTCCCATCAATCAGCCAAGAA |
| AQP5            | CGGGCTTTCTTCTACGTGG      | GCTGGAAGGTCAGAATCAGCTC |
| $\beta_2$ -AR   | TTGCTGGCACCCAATAGAAGC    | CAGACGCTCGAACTTGGCA    |
| TGF $\beta$ -R1 | ACGGCGTTACAGTGTTTCTG     | GCACATACAAACGGCCTATCTC |
| LEF1            | AGAACACCCCGATGACGGA      | GGCATCATTATGTACCCGGAAT |
| BMPRI1A         | AGATGACCAGGGAGAAACCAC    | CAACATTCTATTGTCCGGCGTA |
| FGFR2           | AGCACCATACTGGACCAACAC    | GGCAGCGAAACTTGACAGTG   |
| EGFR            | TTGCCGCAAAGTGTGTAACG     | GTCACCCCTAAATGCCACCG   |
| RAR $\alpha$    | AAGCCCGAGTGCTCTGAGA      | TTCGTAGTGTATTTGCCCAGC  |
| EDA             | GGACGGCACCTACTTCATCT     | TGTAGTTGGTCTTGCCCGTC   |
| $\beta$ -ACTIN  | CATGTACGTTGCTATCCAGGC    | CTCCTTAATGTCACGCACGAT  |

*CK5* cytokeratin 5, *CK10* cytokeratin 10, *CK18* cytokeratin 18, *CEA* carcino-embryonic antigen, *AQP5* aquaporin 5,  $\beta_2$ -AR  $\beta_2$ -adrenergic receptor, *TGF $\beta$ -R1* TGF- $\beta$  type 1 receptor, *LEF1* lymphoid enhancer-binding factor 1, *BMPRI1A* bone morphogenetic protein receptor 1A, *FGFR2* fibroblast growth factor receptor 2, *EGFR* epidermal growth factor receptor, *RAR $\alpha$*  retinoic acid receptor  $\alpha$ , *EDA* ectodermal dysplasia antigen
