# Supplementary material for: Small molecules facilitate single factor-mediated sweat gland cell reprogramming
Source: PubMed Central journal article supplement (PMC8962256; doi:10.1186/s40779-022-00372-5), 2022-03-29
Supplement: 40779_2022_372_MOESM2_ESM.pdf [file 40779_2022_372_MOESM2_ESM.pdf]

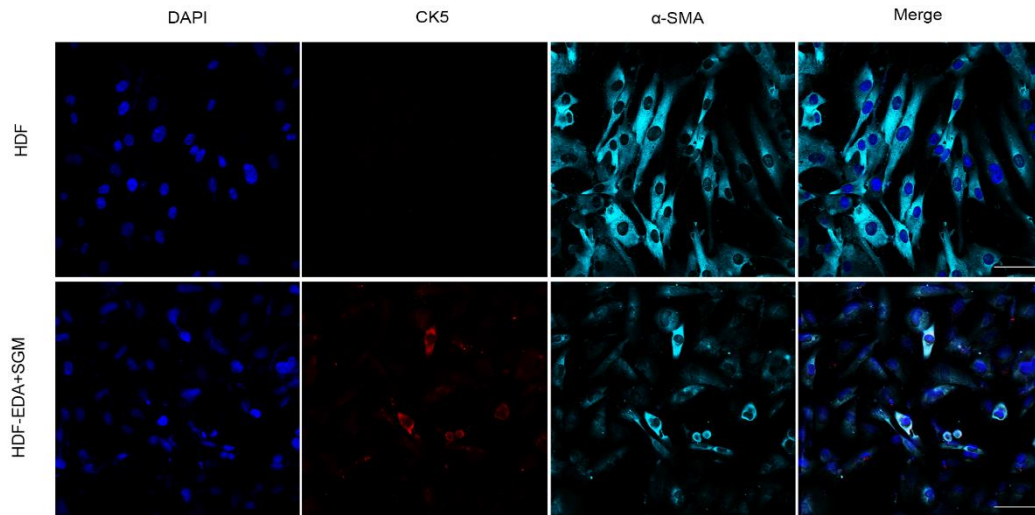

**Fig. S1** Generation of iSGC from HDF via EDA activation together with SGM culture. Immunofluorescence assay of expression patterns of HDF-EDA cells in SGM culture, mainly expressing myoepithelial cell-associated proteins CK5 and  $\alpha$ -SMA. Scale bar = 50  $\mu$ m. iSGC induced sweat gland-like cell, HDF human dermal fibroblasts, EDA ectodermal dysplasia antigen, SGM sweat gland culture medium, CK5 cytokeratin 5,  $\alpha$ -SMA  $\alpha$ -smooth muscle actin

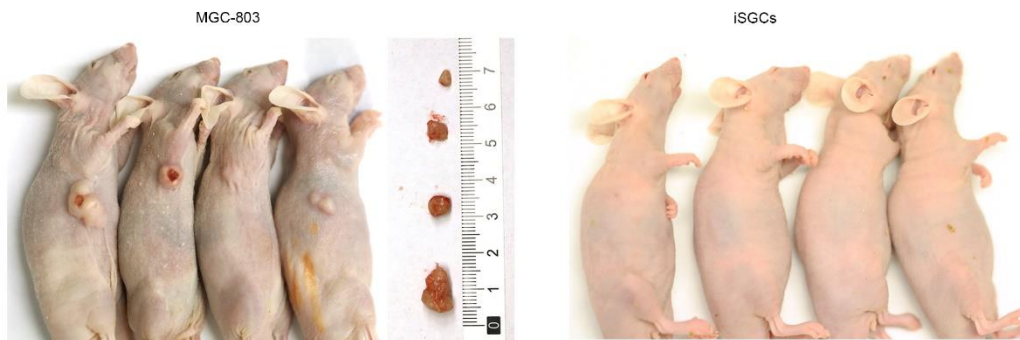

**Fig. S2** In vivo safety assessment of iSGC. MCG-803 gastric cell lines were used as positive controls. Cells were collected and injected subcutaneously at  $1 \times 10^7$  cells per site. On day 25 after implantation, no tumors were seen in iSGC-treated mice, whereas xenograft tumors were observed in MGC803 group.  $n = 4$ . iSGC induced sweat gland-like cell
